# Supplementary material for: A quantitative intracellular peptide binding assay reveals recognition determinants and context dependence of short linear motifs
Source: PubMed Central journal article supplement — bioRxiv. 2024 Nov 1:2024.10.30.621084. Preprint. [Version 1] doi: 10.1101/2024.10.30.621084 (PMC11565833; doi:10.1101/2024.10.30.621084), 2024-11-01
Supplement: NIHPP2024.10.30.621084v1-supplement-1.pdf [file NIHPP2024.10.30.621084v1-supplement-1.pdf]

## SUPPORTING INFORMATION

### Supporting Figure Legends

#### Figure S1. Low-throughput assays of SLiM binding to six domains

- (A) List of tested TNKS2<sup>ARC4</sup>-binding peptides.  $K_D$  values are from [54].
- (B) The experiment shown in Figure 2B was repeated using the transcriptional reporter, FUS1-lacZ (mean  $\pm$  SD;  $n = 4$ ).
- (C) Comparison of the fold inhibition in FUS1-lacZ vs. P-MAPK assays, for all peptides in panel A. Both assays show affinity-dependent inhibition, but the P-MAPK assay detects weak binding with greater sensitivity. Fold inhibition (mean  $\pm$  SD,  $n = 4$ ) is the difference in signal between the test peptide and the control, as a fraction of the control signal.  $K_D$  values are mean  $\pm$  SE [54].
- (D) SLiM recognition by the Abp1<sup>SH3</sup> domain, assayed using the FUS1-lacZ reporter. Bars, mean  $\pm$  SD ( $n = 3$ ).  $K_D$  values from [53].
- (E) SLiM recognition by MDM2<sup>SWIB</sup> and MDM4<sup>SWIB</sup> domains, assayed as in Figure 2B. Bars, mean  $\pm$  range ( $n = 2$ ).  $K_D$  values from [33, 65].
- (F) SLiM recognition by YAP<sup>WW1</sup> and NEDD4<sup>WW3</sup> domains, assayed as in Figure 2B. Bars, mean  $\pm$  range ( $n = 2$ ). Note that  $K_D$  values from distinct studies [55, 56] might not be directly comparable.
- (G) Protein levels of GST-tagged Cln2 fusions expressed from promoters of different strengths ( $P_{GAL1}$ ,  $P_{GALS}$ ,  $P_{GALL}$ ). Expression was induced with galactose for 105 min. G6PDH served as a loading control.

#### Figure S2. SIMBA interrogation of multiple TNKS2<sup>ARC4</sup>-binding peptides

- (A) SIMBA scores vs.  $K_D$  for all 3BP2 variants as well as variants at each of 8 individual positions, plotted as in Figure 3C, with the TNKS2<sup>ARC4</sup>-Cln2 fusion driven by  $P_{GAL1}$  or  $P_{GALS}$ . All SIMBA scores are mean  $\pm$  SEM ( $n = 4$ ).
- (B) Sequence and  $K_D$  of each motif subjected to DMS and SIMBA. Residues in the 8 core positions are colored where identical to (blue) or different from (orange) the 3BP2 sequence.
- (C) Heatmaps of DMS results from six parent peptides, plotted as in Figure 3A.
- (D) Distribution of SIMBA scores for all missense variants (black circles) and the average STOP codon (red X symbols) at the 12 positions in each of the 6 parent motifs.
- (E) Correlation of SIMBA scores for variants inserted at the N-site vs. C-site locations, plotted as in Figure 3G, for six parent peptides.
- (F) Correlation of SIMBA scores when the TNKS2<sup>ARC4</sup>-Cln2 fusion was expressed from  $P_{GAL1}$  vs.  $P_{GALS}$ , plotted as in Figure 3F, for six parent peptides.
- (G) Sequence preference logos, averaged from 5 motifs (excluding 3BP2-E5), comparing when the TNKS2<sup>ARC4</sup>-Cln2 fusion was expressed from  $P_{GAL1}$  vs.  $P_{GALS}$ .

#### Figure S3. DMS data and characteristics of WW domain-binding peptides

- (A) WW domain peptides used in this study, and their reported binding affinities. The consensus peptides (PYcon1-4) were designed based on “multiple PWM” sequences from Figure S1B of Ref [74], which were proposed as improved predictors of binding specificity compared to single PWMs.
- (B) Heatmaps of DMS results for 12 peptides combined with 2 WW domains. Data are the mean of 3 independent replicate experiments.
- (C) Conformations of WW domain bound peptides in published structures. The orientation is comparable to that in Figure 6G. PDB IDs: 4n7h, 2m3o, 2ez5, 5ydx, 2ltw.
- (D) Plot of buried surface area (BSA) for residues in WW-bound peptides, expressed as a percentage of accessible surface area in the unbound peptide. Data are from 4 NEDD4<sup>WW3</sup> complexes (all type 1) and 2 YAP<sup>WW1</sup> complexes (type 2). Peptide names include PDB IDs.

## Supporting Tables

**Table S1. Yeast strains used in this study**

| Name    | Relevant genotype *                                                                                                 | Source     |
|---------|---------------------------------------------------------------------------------------------------------------------|------------|
| PPY2551 | <i>MATa bar1Δ STE5-8A ste20Δ::kanMX6 HIS3::P<sub>GAL1</sub>-GST-CLN2</i>                                            | Ref. [20]  |
| PPY2617 | <i>MATa bar1Δ STE5-8A ste20Δ::kanMX6 FUS1::FUS1-lacZ::LEU2</i>                                                      | This study |
| PPY2622 | <i>MATa bar1Δ STE5-8A ste20Δ::kanMX6 FUS1::FUS1-lacZ::LEU2 HIS3::P<sub>GAL1</sub>-GST-MDM2<sup>SWB</sup>-CLN2</i>   | This study |
| PPY2623 | <i>MATa bar1Δ STE5-8A ste20Δ::kanMX6 FUS1::FUS1-lacZ::LEU2 HIS3::P<sub>GAL1</sub>-GST-TNKS2<sup>ARC4</sup>-CLN2</i> | This study |
| PPY2625 | <i>MATa bar1Δ STE5-8A ste20Δ::kanMX6 FUS1::FUS1-lacZ::LEU2 HIS3::P<sub>GALL</sub>-GST-MDM2<sup>SWB</sup>-CLN2</i>   | This study |
| PPY2628 | <i>MATa bar1Δ STE5-8A ste20Δ::kanMX6 FUS1::FUS1-lacZ::LEU2 HIS3::P<sub>GALS</sub>-GST-MDM2<sup>SWB</sup>-CLN2</i>   | This study |
| PPY2629 | <i>MATa bar1Δ STE5-8A ste20Δ::kanMX6 FUS1::FUS1-lacZ::LEU2 HIS3::P<sub>GALL</sub>-GST-TNKS2<sup>ARC4</sup>-CLN2</i> | This study |
| PPY2631 | <i>MATa bar1Δ STE5-8A ste20Δ::kanMX6 FUS1::FUS1-lacZ::LEU2 HIS3::P<sub>GALS</sub>-GST-TNKS2<sup>ARC4</sup>-CLN2</i> | This study |
| PPY2708 | <i>MATa bar1Δ STE5-8A ste20Δ::kanMX6 FUS1::FUS1-lacZ::LEU2 HIS3::P<sub>GAL1</sub>-GST-CLN2</i>                      | This study |
| PPY2727 | <i>MATa bar1Δ STE5-8A ste20Δ::kanMX6 FUS1::FUS1-lacZ::LEU2 HIS3::P<sub>GAL1</sub>-GST-YAP<sup>WW1</sup>-CLN2</i>    | This study |
| PPY2732 | <i>MATa bar1Δ STE5-8A ste20Δ::kanMX6 FUS1::FUS1-lacZ::LEU2 HIS3::P<sub>GAL1</sub>-GST-NEDD4<sup>WW3</sup>-CLN2</i>  | This study |

\* All strains in W303 background (*ADE2 his3-11,15 leu2-3,112 trp1-1 ura3-1 can1*)

**Table S2. Plasmids used in this study**

| SUBSTRATE fusion plasmids |                                                                  |                           |            |
|---------------------------|------------------------------------------------------------------|---------------------------|------------|
| Name                      | Description                                                      | Peptide Motif Insert      | Source     |
| pPP4365                   | CEN URA3 myc13-(LP_Ste20 motif)-(Ste5 1-85)-(Ste20 312-939)      | LP_Ste20 = VSLDDPIQFTA    | Ref. [20]  |
| pPP4366                   | CEN URA3 myc13-(LP_Ste5 motif)-(Ste5 1-85)-(Ste20 312-939)       | LP_Ste5 = SPLLPFGLSY      | Ref. [20]  |
| pPP4367                   | CEN URA3 myc13-(LP_Sic1 motif)-(Ste5 1-85)-(Ste20 312-939)       | LP_Sic1 = EVLLPPSRPTS     | Ref. [20]  |
| pPP4368                   | CEN URA3 myc13-(LP_Whi5 motif)-(Ste5 1-85)-(Ste20 312-939)       | LP_Whi5 = MPLLPPTPKS      | Ref. [20]  |
| pPP4369                   | CEN URA3 myc13-(LP_Lam5 motif)-(Ste5 1-85)-(Ste20 312-939)       | LP_Lam5 = KQLGPPFEHAS     | Ref. [20]  |
| pPP4375                   | CEN URA3 myc13-(nonLP_control motif)-(Ste5 1-85)-(Ste20 312-939) | nonLP = SNGNGSGSNGN       | Ref. [20]  |
| pPP4518                   | CEN URA3 myc13-(Amot_PY1 motif)-(Ste5 1-85)-(Ste20 312-939)      | Amot_PY1 = NNEELPTYEEAK   | This study |
| pPP4519                   | CEN URA3 myc13-(Amot_PY2 motif)-(Ste5 1-85)-(Ste20 312-939)      | Amot_PY2 = HRGPPPEYPFKG   | This study |
| pPP4521                   | CEN URA3 myc13-(PR_Ark1 motif)-(Ste5 1-85)-(Ste20 312-939)       | PR_Ark1 = KKTPTPPKPSHLK   | This study |
| pPP4522                   | CEN URA3 myc13-(PR_Prk1 motif)-(Ste5 1-85)-(Ste20 312-939)       | PR_Prk1 = KSRPPRPPKPLHLR  | This study |
| pPP4523                   | CEN URA3 myc13-(PY_53BP2 motif)-(Ste5 1-85)-(Ste20 312-939)      | PY_53BP2 = YPPYPPPPYPSG   | This study |
| pPP4524                   | CEN URA3 myc13-(PY_Marburg motif)-(Ste5 1-85)-(Ste20 312-939)    | PY_Marburg = MQYLNPPPYADH | This study |
| pPP4525                   | CEN URA3 myc13-(PY_Rabies motif)-(Ste5 1-85)-(Ste20 312-939)     | PY_Rabies = DLWLPPPEYVPL  | This study |
| pPP4526                   | CEN URA3 myc13-(REctrl motif)-(Ste5 1-85)-(Ste20 312-939)        | REctrl = GSGSRLKPRGGN     | This study |
| pPP4531                   | CEN URA3 myc13-(p53 motif)-(Ste5 1-85)-(Ste20 312-939)           | p53 = SQETFSDLWKLLPEN     | This study |

|         |                                                                               |                                 |            |
|---------|-------------------------------------------------------------------------------|---------------------------------|------------|
| pPP4532 | CEN URA3 myc13-(p53-W23A motif)-(Ste5 1-85)-(Ste20 312-939)                   | p53-W23A = SQETFSDLAKLLPEN      | This study |
| pPP4533 | CEN URA3 myc13-(p53-P27A motif)-(Ste5 1-85)-(Ste20 312-939)                   | p53-P27A = SQETFSDLWKLLAEN      | This study |
| pPP4534 | CEN URA3 myc13-(NUMB motif)-(Ste5 1-85)-(Ste20 312-939)                       | NUMB = PVDPFQAQWAALENK          | This study |
| pPP4536 | CEN URA3 myc13-(3BP2 motif)-(Ste5 1-85)-(Ste20 312-939)                       | 3BP2 = LQRSPPDGQSFR             | This study |
| pPP4537 | CEN URA3 myc13-(3BP2-E5 motif)-(Ste5 1-85)-(Ste20 312-939)                    | 3BP2-D5E = LQRSPPEGQSFR         | This study |
| pPP4538 | CEN URA3 myc13-(3BP2-A5 motif)-(Ste5 1-85)-(Ste20 312-939)                    | 3BP2-D5A = LQRSPPADGQSFR        | This study |
| pPP4539 | CEN URA3 myc13-(RPGopt motif)-(Ste5 1-85)-(Ste20 312-939)                     | RPGopt = LAREAGDGEEAR           | This study |
| pPP4540 | CEN URA3 myc13-(NUMA1 motif)-(Ste5 1-85)-(Ste20 312-939)                      | NUMA1 = LPRTQPDGTSVP            | This study |
| pPP4541 | CEN URA3 myc13-(MCL1 motif)-(Ste5 1-85)-(Ste20 312-939)                       | MCL1 = VARPPPIGAIEVP            | This study |
| pPP4649 | CEN URA3 myc13-(3BP2-Q5 motif)-(Ste5 1-85)-(Ste20 312-939)                    | 3BP2-D5Q = LQRSPPDGQSFR         | This study |
| pPP4650 | CEN URA3 myc13-(3BP2-S3 motif)-(Ste5 1-85)-(Ste20 312-939)                    | 3BP2-P3S = LQRSPPDGQSFR         | This study |
| pPP4651 | CEN URA3 myc13-(3BP2-M3 motif)-(Ste5 1-85)-(Ste20 312-939)                    | 3BP2-P3M = LQRSPPDGQSFR         | This study |
| pPP4652 | CEN URA3 myc13-(3BP2-A4 motif)-(Ste5 1-85)-(Ste20 312-939)                    | 3BP2-P4A = LQRSPADGQSFR         | This study |
| pPP4653 | CEN URA3 myc13-(AXIN1 motif)-(Ste5 1-85)-(Ste20 312-939)                      | AXIN1 = APRPPVPGEEGE            | This study |
| pPP4654 | CEN URA3 myc13-(AXIN1-P2A motif)-(Ste5 1-85)-(Ste20 312-939)                  | AXIN1-P2A = APRAPVPGEEGE        | This study |
| pPP4655 | CEN URA3 myc13-(AXIN1-P3A motif)-(Ste5 1-85)-(Ste20 312-939)                  | AXIN1-P3A = APRPAVPGEEGE        | This study |
| pPP4656 | CEN URA3 myc13-(AXIN1-V4A motif)-(Ste5 1-85)-(Ste20 312-939)                  | AXIN1-V4A = APRPPAPGEEGE        | This study |
| pPP4657 | CEN URA3 myc13-(AXIN1-P5A motif)-(Ste5 1-85)-(Ste20 312-939)                  | AXIN1-P5A = APRPPVAGEEGE        | This study |
| pPP4745 | CEN URA3 myc13-(Ste20 1-86)-(Ste5 1-85)-(C3RE control motif)-(Ste20 312-939)  | C3RE = DVCTPR                   | This study |
| pPP4747 | CEN URA3 myc13-(Ste20 1-86)-(Ste5 1-85)-(LP_Ste5 motif)-(Ste20 312-939)       | LP_Ste5 = SPLLPFGLSYT           | This study |
| pPP4748 | CEN URA3 myc13-(Ste20 1-86)-(Ste5 1-85)-(Cnon2 control motif)-(Ste20 312-939) | Cnon2 = GSNGGSGSNGGS            | This study |
| pPP4749 | CEN URA3 myc13-(Ste20 1-86)-(Ste5 1-85)-(Cctrl control motif)-(Ste20 312-939) | Cctrl = GSGGSGSGSGGS            | This study |
| pPP4750 | CEN URA3 myc13-(Ste20 1-86)-(Ste5 1-85)-(LP_Ste20 motif)-(Ste20 312-939)      | LP_Ste20 = VSLDDPIQFTRV         | This study |
| pPP4751 | CEN URA3 myc13-(Ste20 1-86)-(Ste5 1-85)-(LP_Lam5 motif)-(Ste20 312-939)       | LP_Lam5 = KQLGPPFEHASN          | This study |
| pPP4762 | CEN URA3 myc13-(3BP2 motif)-(Ste5 1-85)-(Ste20 312-939)                       | 3BP2 = ggsgLQRSPPDGQSFRggsg     | This study |
| pPP4763 | CEN URA3 myc13-(3BP2-D5E motif)-(Ste5 1-85)-(Ste20 312-939)                   | 3BP2-D5E = ggsgLQRSPPEGQSFRggsg | This study |
| pPP4764 | CEN URA3 myc13-(RPGopt motif)-(Ste5 1-85)-(Ste20 312-939)                     | RPGopt = ggsgLAREAGDGEEARggsg   | This study |
| pPP4765 | CEN URA3 myc13-(NUMA1 motif)-(Ste5 1-85)-(Ste20 312-939)                      | NUMA1 = ggsgLPRTQPDGTSVPggsg    | This study |
| pPP4766 | CEN URA3 myc13-(MCL1 motif)-(Ste5 1-85)-(Ste20 312-939)                       | MCL1 = ggsgVARPPPIGAIEVPggsg    | This study |
| pPP4767 | CEN URA3 myc13-(AXIN1 motif)-(Ste5 1-85)-(Ste20 312-939)                      | AXIN1 = ggsgAPRPPVPGEEGEggsg    | This study |
| pPP4768 | CEN URA3 myc13-(Ste20 1-86)-(Ste5 1-85)-(3BP2 motif)-(Ste20 312-939)          | 3BP2-WT = ggsgLQRSPPDGQSFRggsg  | This study |
| pPP4769 | CEN URA3 myc13-(Ste20 1-86)-(Ste5 1-85)-(NUMA1 motif)-(Ste20 312-939)         | NUMA1 = ggsgLPRTQPDGTSVPggsg    | This study |
| pPP4836 | CEN URA3 myc13-(p53 motif)-(Ste5 1-85)-(Ste20 312-939)                        | p53 = ggsgSQETFSDLWKLLPENggsg   | This study |
| pPP4837 | CEN URA3 myc13-(NUMB motif)-(Ste5 1-85)-(Ste20 312-939)                       | NUMB = ggsgPVDPFQAQWAALENKggsg  | This study |

| <b>CYCLIN fusion plasmids</b> |                                                           |                              |               |
|-------------------------------|-----------------------------------------------------------|------------------------------|---------------|
| <b>Name</b>                   | <b>Description</b>                                        | <b>Binding Domain Insert</b> | <b>Source</b> |
| pPP3573                       | CEN HIS3 Pgal1-GST-CLN2(1-372) Tcyc1                      | none                         | This study    |
| pPP4517                       | CEN HIS3 Pgal1-GST-(YAP_WW1)-CLN2(1-372) Tcyc1            | YAP_WW1 = aa 164-227         | This study    |
| pPP4520                       | CEN HIS3 Pgal1-GST-(Abp1_SH3)-CLN2(1-372) Tcyc1           | Abp1_SH3 = aa 535-592        | This study    |
| pPP4527                       | CEN HIS3 Pgal1-GST-(NEDD4_WW3)-CLN2(1-372) Tcyc1          | NEDD4_WW3 = aa 834-878       | This study    |
| pPP4542                       | CEN HIS3 Pgal1-GST-(TNKS2_ARC4)-CLN2(1-372) Tcyc1         | TNKS2_ARC4 = aa 488-649      | This study    |
| pPP4543                       | CEN HIS3 Pgal1-GST-(MDM2_SWIB)-CLN2(1-372) Tcyc1          | MDM2_SWIB = aa 17-109        | This study    |
| pPP4544                       | CEN HIS3 Pgal1-GST-(MDM4_SWIB)-CLN2(1-372) Tcyc1          | MDM4_SWIB = aa 24-108        | This study    |
| pPP4575                       | integrating HIS3 Pgal1-GST-(MDM2_SWIB)-CLN2(1-545) Tcyc1  | MDM2_SWIB = aa 17-109        | This study    |
| pPP4576                       | integrating HIS3 Pgal1-GST-(TNKS2_ARC4)-CLN2(1-545) Tcyc1 | TNKS2_ARC4 = aa 488-649      | This study    |
| pPP4643                       | integrating HIS3 PgalL-GST-(MDM2_SWIB)-CLN2(1-545) Tcyc1  | MDM2_SWIB = aa 17-109        | This study    |
| pPP4644                       | integrating HIS3 PgalS-GST-(MDM2_SWIB)-CLN2(1-545) Tcyc1  | MDM2_SWIB = aa 17-109        | This study    |
| pPP4659                       | integrating HIS3 PgalL-GST-(TNKS2_ARC4)-CLN2(1-545) Tcyc1 | TNKS2_ARC4 = aa 488-649      | This study    |
| pPP4660                       | integrating HIS3 PgalS-GST-(TNKS2_ARC4)-CLN2(1-545) Tcyc1 | TNKS2_ARC4 = aa 488-649      | This study    |
| pPP4866                       | integrating HIS3 Pgal1-GST-(YAP_WW1)-CLN2(1-545) Tcyc1    | YAP_WW1 = aa 164-227         | This study    |
| pPP4867                       | integrating HIS3 Pgal1-GST-(NEDD4_WW3)-CLN2(1-545) Tcyc1  | NEDD4_WW3 = aa 834-878       | This study    |

**Figure S1**

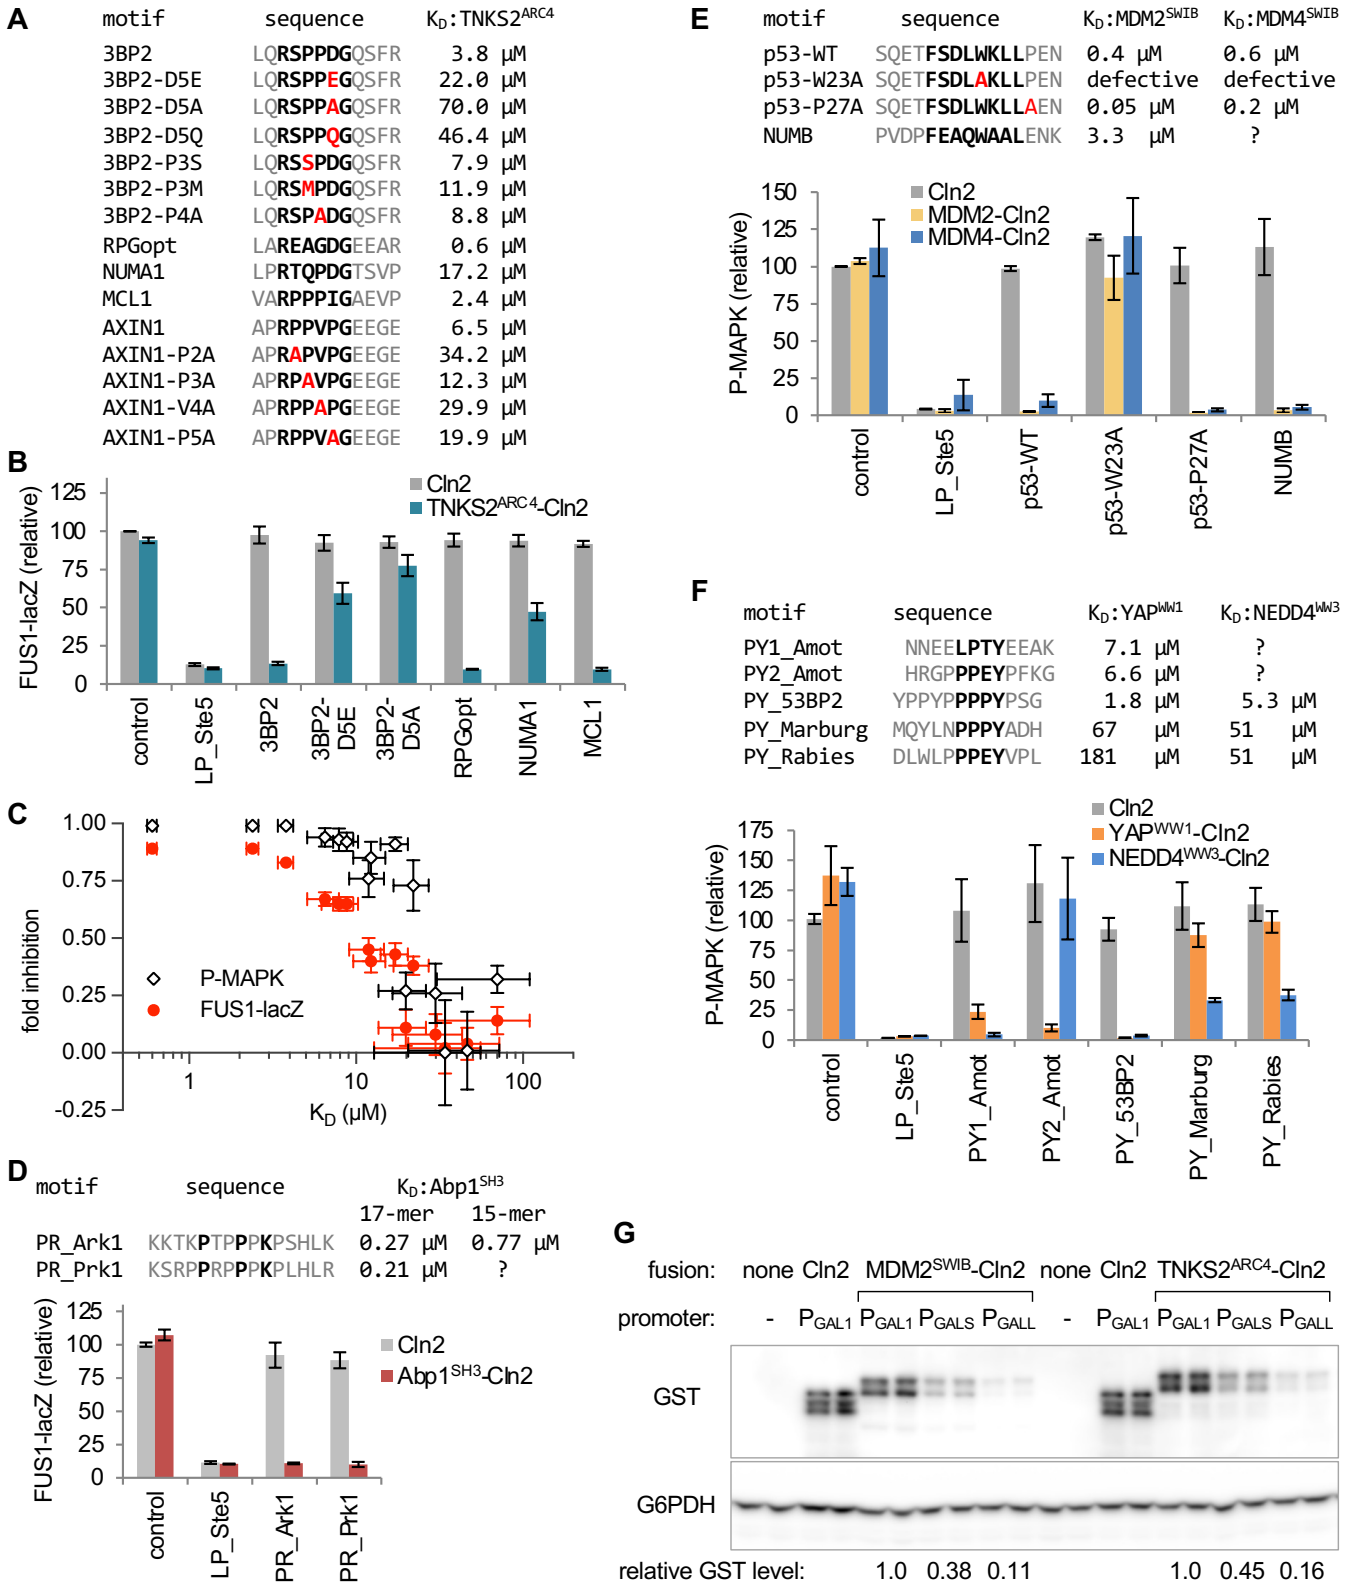

**Figure S1. Low-throughput assays of SLiM binding to six domains**

(A) List of tested TNKS2<sup>ARC4</sup>-binding peptides.  $K_D$  values are from [54]. (B) The experiment shown in Figure 2B was repeated using the transcriptional reporter, FUS1-lacZ (mean  $\pm$  SD;  $n = 4$ ). (C) Comparison of the fold inhibition in FUS1-lacZ vs. P-MAPK assays, for all peptides in panel A. Both assays show affinity-dependent inhibition, but the P-MAPK assay detects weak binding with greater sensitivity. Fold inhibition (mean  $\pm$  SD,  $n = 4$ ) is the difference in signal between the test peptide and the control, as a fraction of the control signal.  $K_D$  values are mean  $\pm$  SE [54]. (D) SLiM recognition by the Abp1<sup>SH3</sup> domain, assayed using the FUS1-lacZ reporter. Bars, mean  $\pm$  SD ( $n = 3$ ).  $K_D$  values from [53]. (E) SLiM recognition by MDM2<sup>SWIB</sup> and MDM4<sup>SWIB</sup> domains, assayed as in Figure 2B. Bars, mean  $\pm$  range ( $n = 2$ ).  $K_D$  values from [33, 65]. (F) SLiM recognition by YAP<sup>WW1</sup> and NEDD4<sup>WW3</sup> domains, assayed as in Figure 2B. Bars, mean  $\pm$  range ( $n = 2$ ). Note that  $K_D$  values from distinct studies [55, 56] might not be directly comparable. (G) Protein levels of GST-tagged Cln2 fusions expressed from promoters of different strengths (P<sub>GAL1</sub>, P<sub>GALS</sub>, P<sub>GALL</sub>). Expression was induced with galactose for 105 min. G6PDH served as a loading control.

**Figure S2**

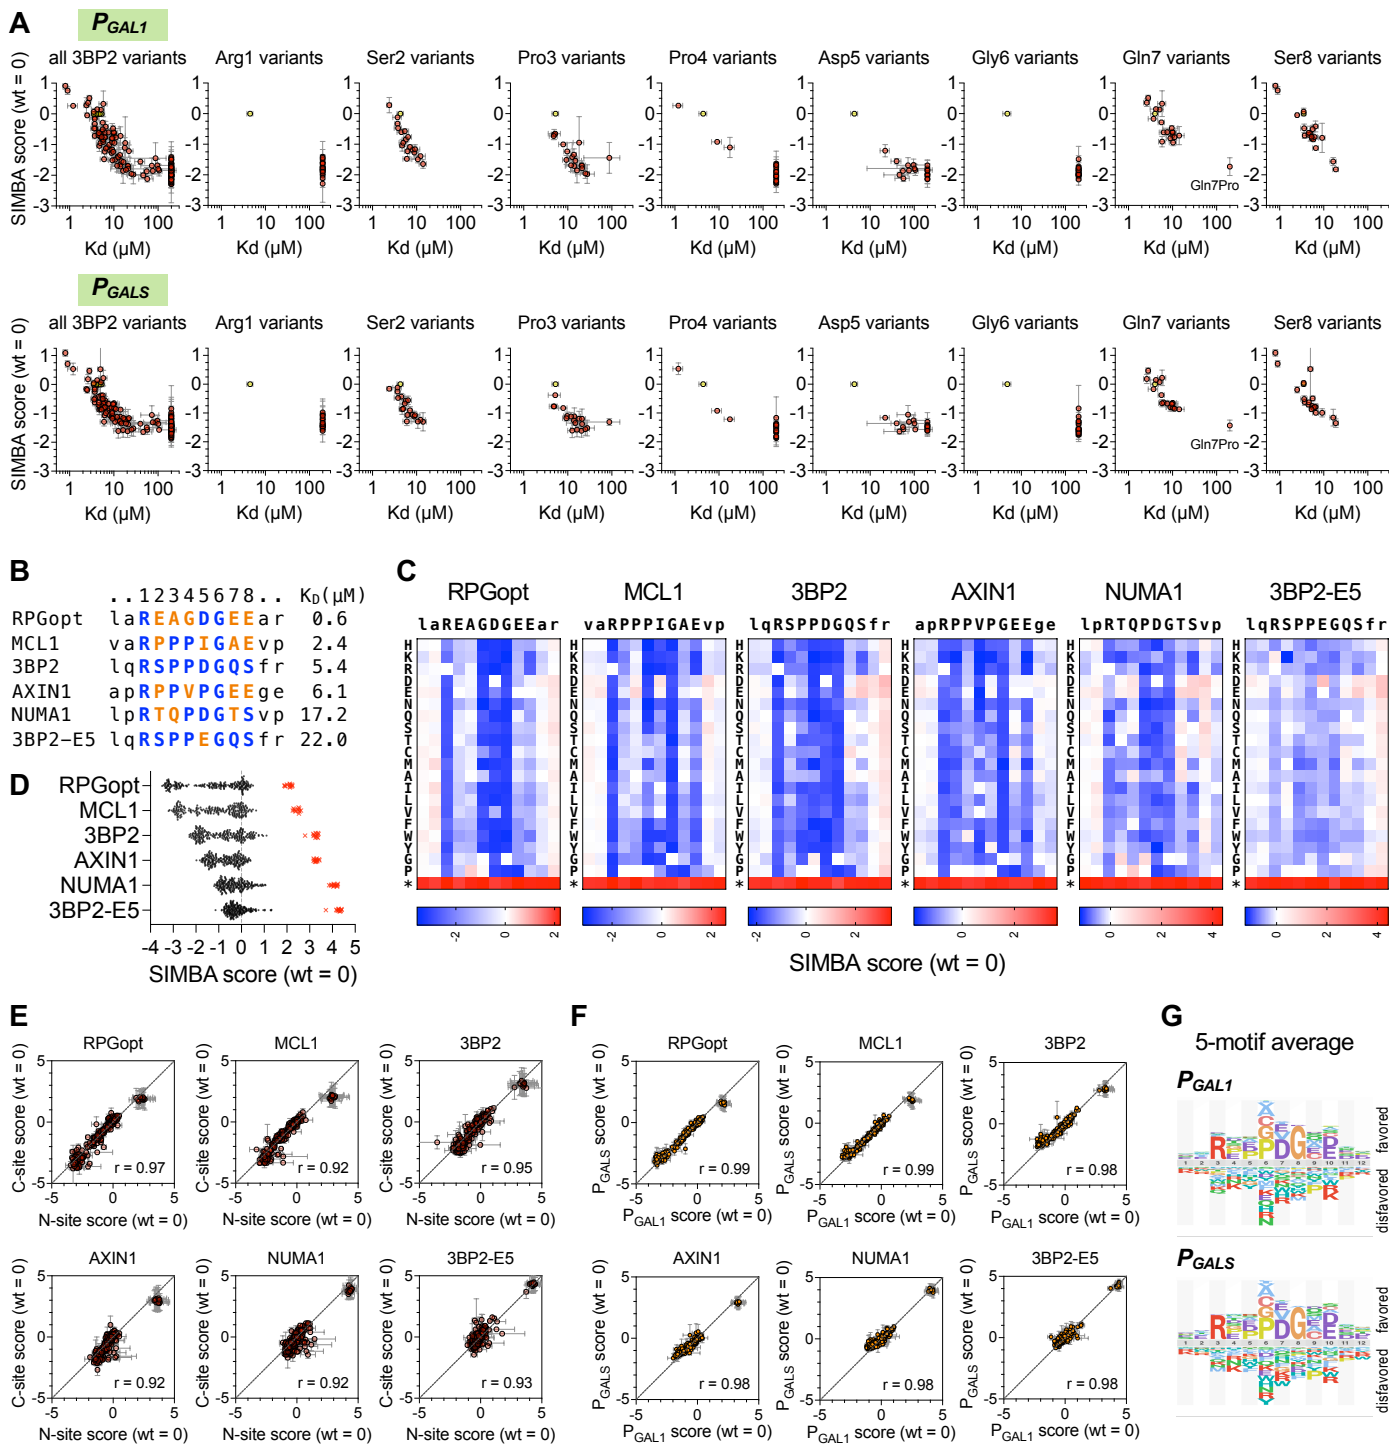

**Figure S2. SIMBA interrogation of multiple  $TNKS2^{ARC4}$ -binding peptides**

(A) SIMBA scores vs.  $K_D$  for all 3BP2 variants as well as variants at each of 8 individual positions, plotted as in Figure 3C, with the  $TNKS2^{ARC4}$ -Cln2 fusion driven by  $P_{GAL1}$  or  $P_{GALS}$ . All SIMBA scores are mean  $\pm$  SEM ( $n = 4$ ). (B) Sequence and  $K_D$  of each motif subjected to DMS and SIMBA. Residues in the 8 core positions are colored where identical to (blue) or different from (orange) the 3BP2 sequence. (C) Heatmaps of DMS results from six parent peptides, plotted as in Figure 3A. (D) Distribution of SIMBA scores for all missense variants (black circles) and the average STOP codon (red X symbols) at the 12 positions in each of the 6 parent motifs. (E) Correlation of SIMBA scores for variants inserted at the N-site vs. C-site locations, plotted as in Figure 3G, for six parent peptides. (F) Correlation of SIMBA scores when the  $TNKS2^{ARC4}$ -Cln2 fusion was expressed from  $P_{GAL1}$  vs.  $P_{GALS}$ , plotted as in Figure 3F, for six parent peptides. (G) Sequence preference logos, averaged from 5 motifs (excluding 3BP2-E5), comparing when the  $TNKS2^{ARC4}$ -Cln2 fusion was expressed from  $P_{GAL1}$  vs.  $P_{GALS}$ .

**Figure S3**

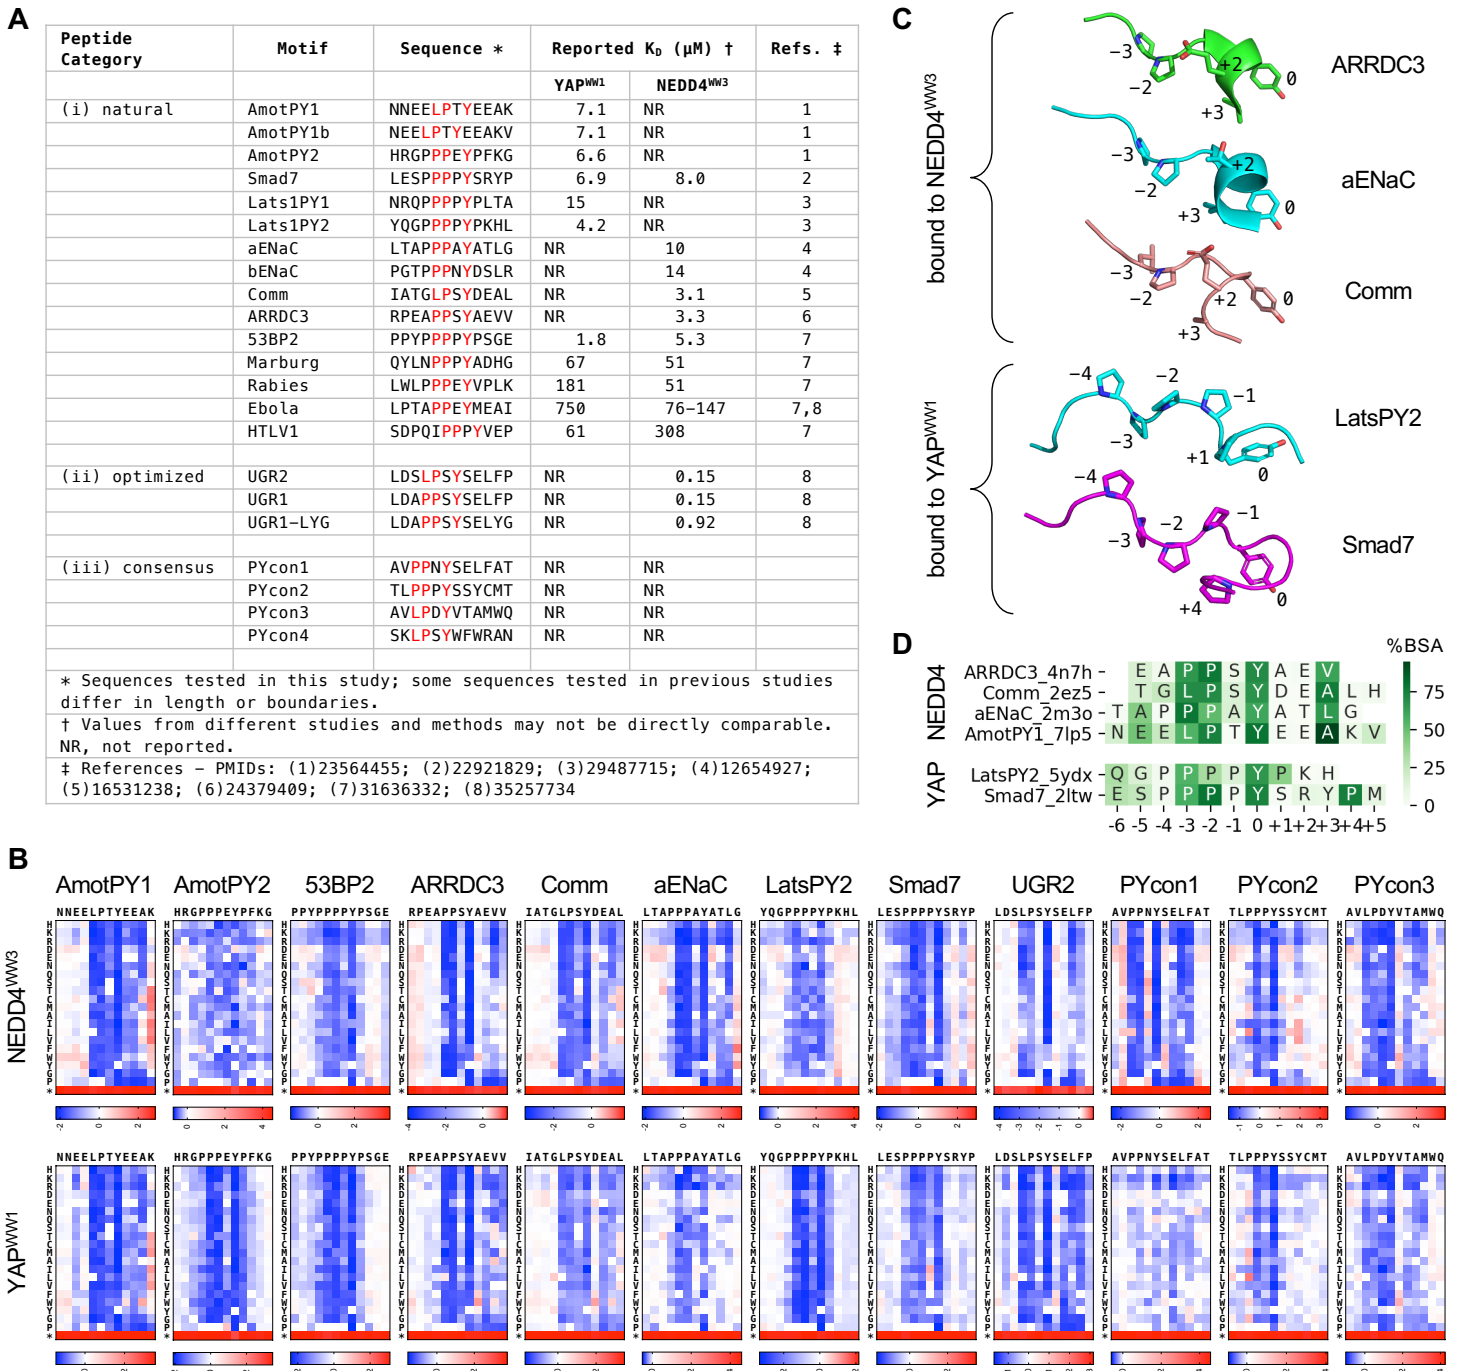

**Figure S3. DMS data and characteristics of WW domain-binding peptides**

(A) WW domain peptides used in this study, and their reported binding affinities. The consensus peptides (PYcon1-4) were designed based on “multiple PWM” sequences from Figure S1B of Ref [74], which were proposed as improved predictors of binding specificity compared to single PWMs. (B) Heatmaps of DMS results for 12 peptides combined with 2 WW domains. Data are the mean of 3 independent replicate experiments. (C) Conformations of WW domain bound peptides in published structures. The orientation is comparable to that in Figure 6G. PDB IDs: 4n7h, 2m3o, 2ez5, 5ydx, 2ltw. (D) Plot of buried surface area (BSA) for residues in WW-bound peptides, expressed as a percentage of accessible surface area in the unbound peptide. Data are from 4 NEDD4<sup>WW3</sup> complexes (all type 1) and 2 YAP<sup>WW1</sup> complexes (type 2). Peptide names include PDB IDs.
